# Supplementary material
Source: PubMed Central journal article supplement (PMC8086729)
Supplement: NIHMS1694959-supplement-SI.pdf [file NIHMS1694959-supplement-SI.pdf]

## Supporting Information

### **Significant Suppression of *S. aureus* Colonization on Intramedullary Ti6Al4V Implants Surface-grafted with Vancomycin-bearing Polymer Brushes**

Ben Zhang, Benjamin M. Braun, Jordan D. Skelly, David C. Ayers and Jie Song\*

Department of Orthopedics & Physical Rehabilitation, University of Massachusetts Medical School, Worcester, MA  
01655, USA

[\\*jie.song@umassmed.edu](mailto:*jie.song@umassmed.edu)

## Supplementary Scheme & Figures

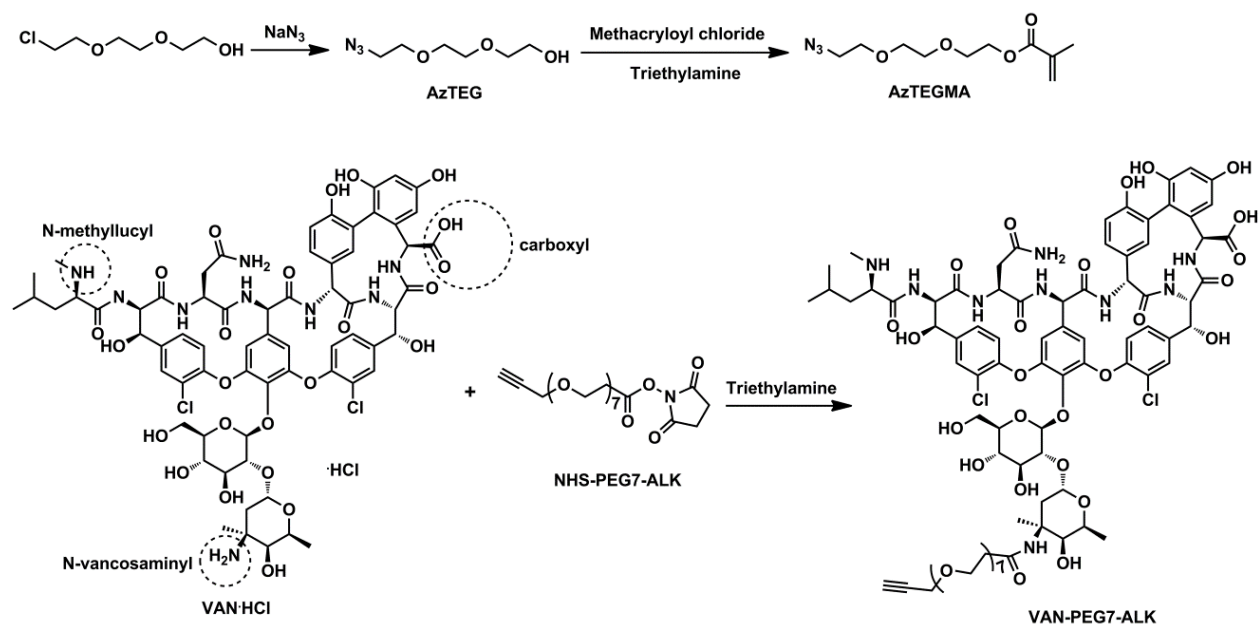

**Scheme S1.** Syntheses of AzTEGMA and VAN-PEG7-ALK.

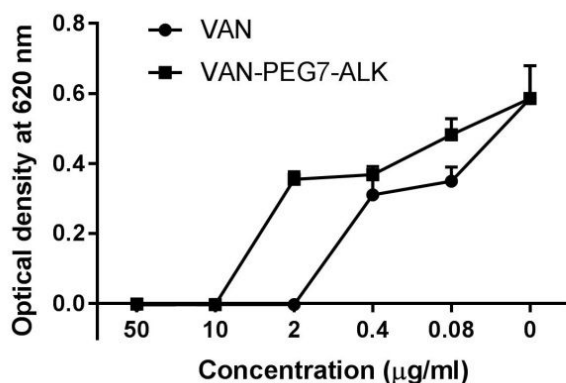

**Figure S1.** Determination of the minimum inhibitory concentrations of unmodified vancomycin (VAN) and VAN-PEG7-ALK against *S. aureus* (n=3). Xen-29 *S. aureus* (5000 CFU, in 20 µl) was seeded into VAN or VAN-PEG7-ALK LB broth solution (150 µl) of various concentrations, and incubated for 24 h at 37 °C under shaking (1 Hz) before the respective optical density (OD) being measured at 620 nm on a Multiskan FC Microplate Photometer (Thermo Scientific).

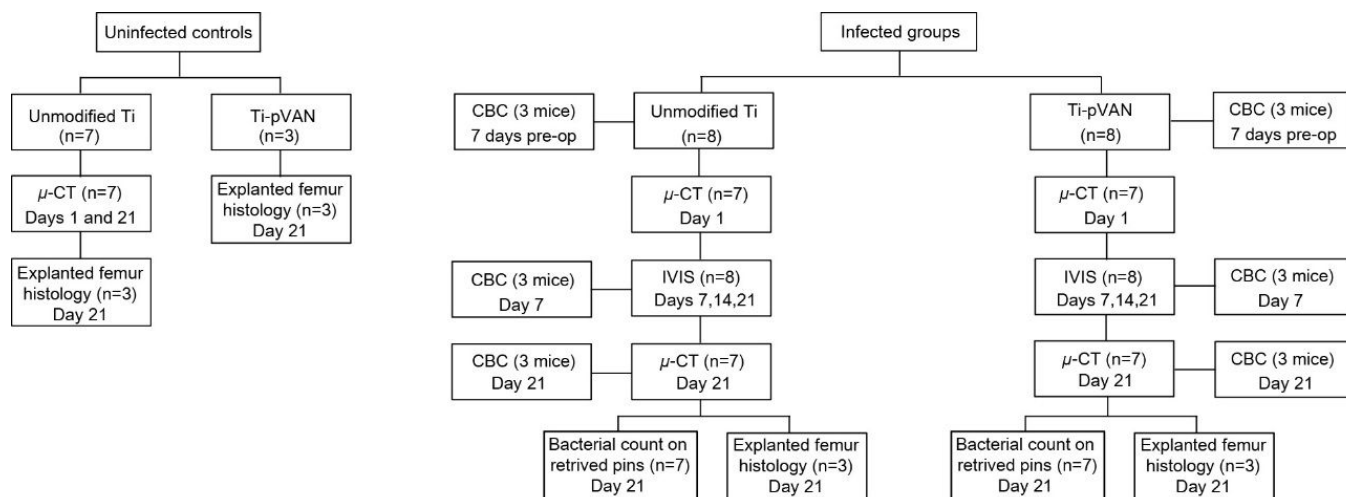

**Figure S2.** *In vivo* study design.

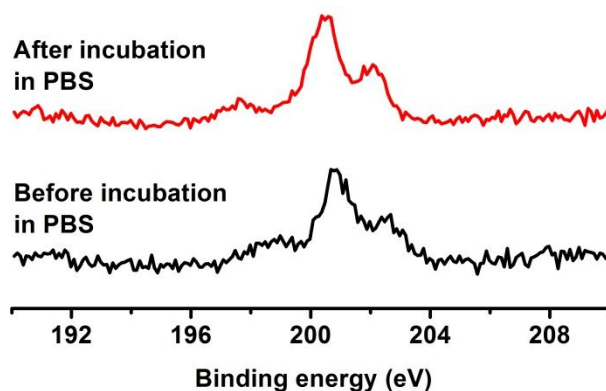

**Figure S3.** High resolution XPS scan of Cl<sub>2</sub>p of Ti-pVAN pin before and after incubation in PBS (pH 7.4) at 37 °C for 14 days.

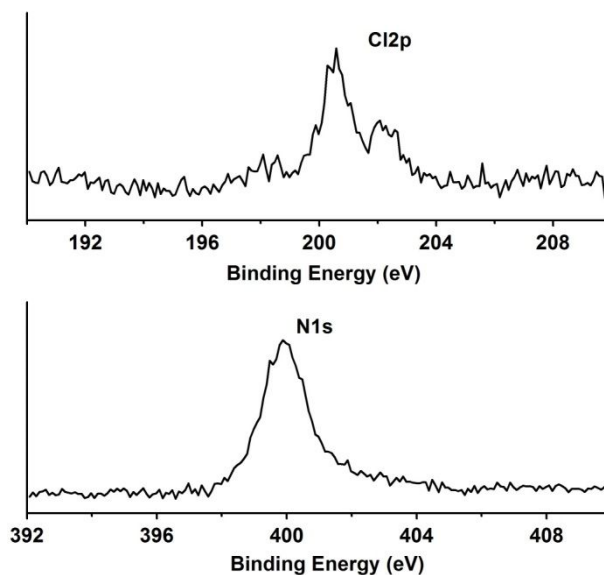

**Figure S4.** XPS high-resolution Cl<sub>2</sub>p and N1s scans of Ti-pVAN pin confirming successful conjugation of vancomycin via SI-ATRP and CuAAC.

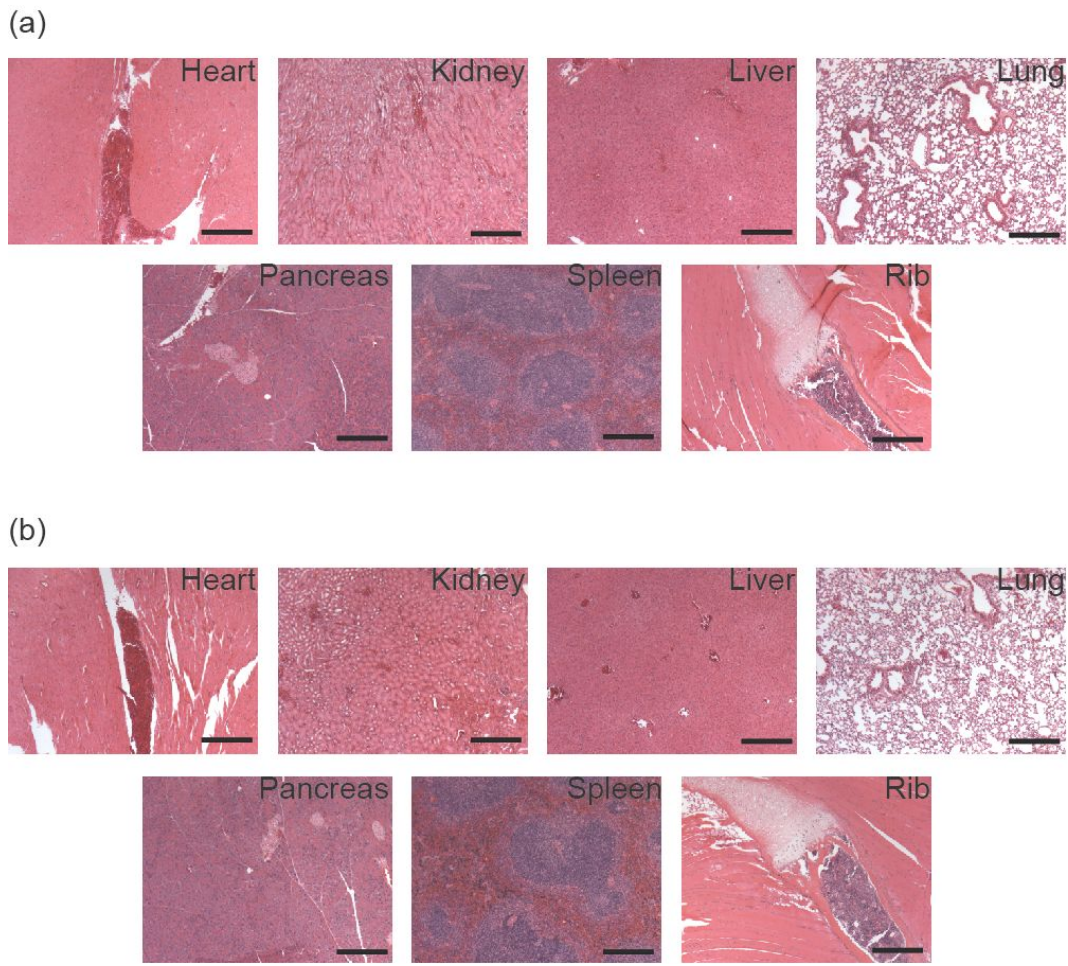

**Figure S5.** Representative key/scavenger organ pathology. (a) Retrieved from normal age-matched untreated control mouse; (b) Retrieved from mouse receiving Ti-pVAN IM pins in the femoral canals inoculated with 40 CFU *S. aureus* at 4 months post-surgery (n=3). Scale bars = 500  $\mu$ m.

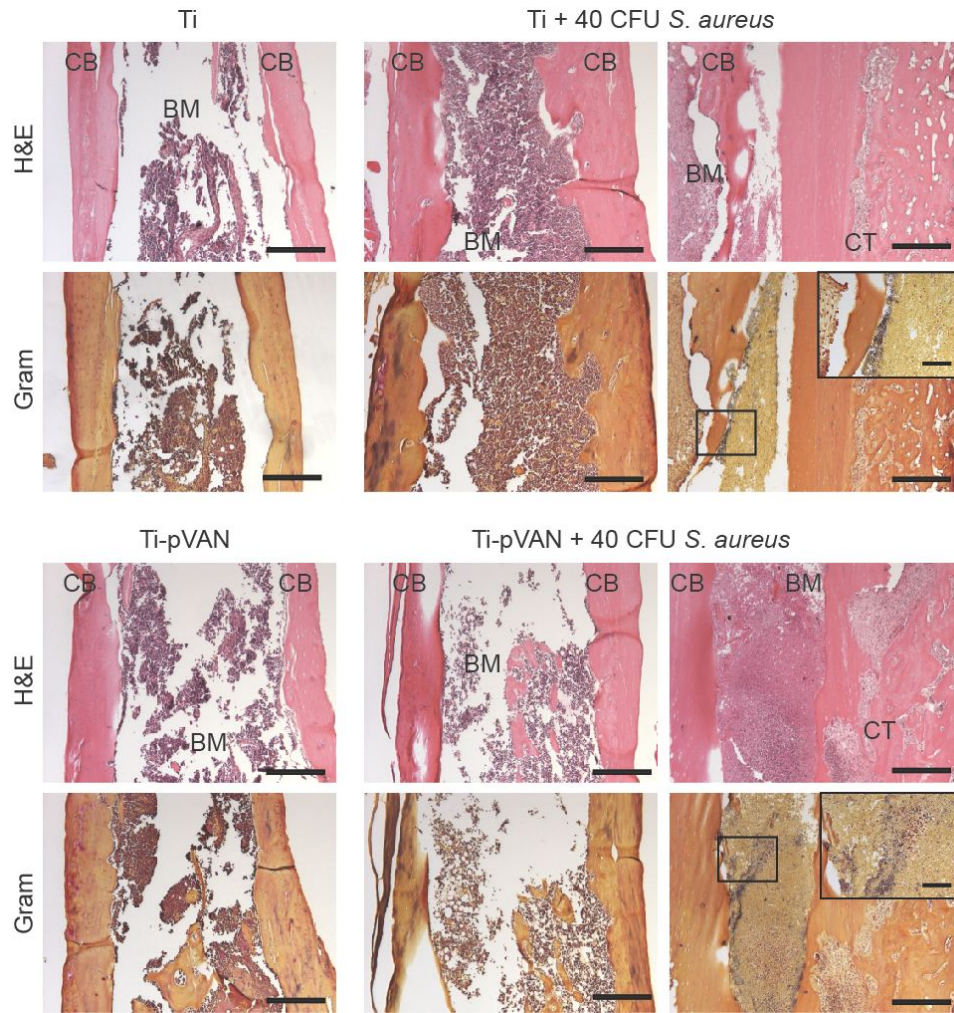

**Figure S6.** Representative H&E and gram staining of the explanted femur after removal of unmodified Ti6Al4V or Ti-pVAN pin, with or without 40 CFU *S. aureus*, at 21 days post-op. Scale bar = 500  $\mu\text{m}$ ; Inset: Scale bar = 100  $\mu\text{m}$ ; CB= cortical bone, BM= bone marrow, CT= cortical thickening.
